# Supplementary material
Source: PubMed Central journal article supplement (PMC3949438)

610 **EXTENDED DATA FIGURE LEGENDS**

611

612 **Extended Data Figure 1. IECs from HDAC3<sup>ΔIEC</sup> mice demonstrate alterations in**  
613 **gene expression coupled with increased histone acetylation. (a, b)** HDAC3 expression  
614 in IECs from HDAC3<sup>FF</sup> or HDAC3<sup>ΔIEC</sup> mice by **(a)** real-time PCR and **(b)** Western  
615 analysis. **(c)** Purity of sort-purified EpCAM<sup>+</sup> IECs. **(d)** Gene-set enrichment analysis  
616 (GSEA) comparing IECs from HDAC3<sup>FF</sup> and HDAC3<sup>ΔIEC</sup> mice to published data  
617 enrichment sets obtained from the Molecular Signatures Database. **(e)** Heat map of  
618 H3K9Ac signal in IECs from HDAC3<sup>FF</sup> and HDAC3<sup>ΔIEC</sup> mice at genes that are  
619 upregulated in IECs of HDAC3<sup>ΔIEC</sup> mice. Each row represents a single gene sorted by the  
620 peak heights in the HDAC3<sup>ΔIEC</sup> mice. H3K9Ac signals were normalized to reads per  
621 kilobase per 10 million mapped reads. **(f)** ChIP-qPCR comparing H3K9Ac levels in IECs  
622 from HDAC3<sup>ΔIEC</sup> mice versus HDAC3<sup>FF</sup> mice at promoter regions of select upregulated  
623 genes. Data are presented as fold difference relative to control HDAC3<sup>FF</sup> IECs. *n*=3 mice  
624 per group. \**p*<0.05.

625

626 **Extended Data Figure 2. HDAC3<sup>ΔIEC</sup> mice exhibit altered IEC homeostasis. (a)**  
627 Representative H&E (left) and lysozyme (right) stained sections of small intestine from  
628 18 day old HDAC3<sup>FF</sup> and HDAC3<sup>ΔIEC</sup> mice. Bars, 50mm. **(b)** Immunohistochemistry for  
629 active caspase-3 in small intestinal crypts from HDAC3<sup>FF</sup> and HDAC3<sup>ΔIEC</sup> mice. Arrows  
630 indicate positive nuclear staining. Bars, 50mm. **(c)** Electron micrograph of littermate  
631 HDAC3<sup>FF</sup> and HDAC3<sup>ΔIEC</sup> Paneth cells. Bars, 2mm. **(d)** Immunohistochemistry for Ki-67  
632 in colonic crypts from HDAC3<sup>FF</sup> and HDAC3<sup>ΔIEC</sup> mice. Bars, 50mm.

633

634 **Extended Data Figure 3. HDAC3<sup>ΔIEC</sup> mice demonstrate impaired intestinal barrier**

635 **function, spontaneous intestinal inflammation, and defective anti-bacterial defenses.**

636 **(a)** FITC levels in plasma assessed 4 hours after oral gavage with FITC-dextran

637 (0.6mg/gm) of HDAC3<sup>FF</sup> (*n*=3) and HDAC3<sup>ΔIEC</sup> (*n*=5) mice and presented as fold

638 difference relative to HDAC3<sup>FF</sup> mice. **(b)** Bactericidal activity against *Salmonella*

639 *typhimurium* of supernatants from carbamyl choline (CCh)-stimulated small intestinal

640 crypts. Data are presented as % killing compared to unstimulated crypts. *n*=4 mice per

641 group. **(c)** Daily changes in body weight following oral infection with *L. monocytogenes*.

642 **(d)** Colony forming units (CFU) of *L. monocytogenes* grown on LB plates containing

643 streptomycin from mesenteric lymph nodes (mLN) 72 hours post-infection. HDAC3<sup>FF</sup>

644 (*n*=9) and HDAC3<sup>ΔIEC</sup> (*n*=7). **(e)** Rectal prolapse in a 4 month old HDAC3<sup>ΔIEC</sup> mouse. **(f)**

645 Representative H&E stained section of colons, **(g)** quantification of CD4<sup>+</sup> and CD19<sup>+</sup>

646 cells (gated live, CD45<sup>+</sup>) in lamina propria, and **(h)** disease score from mice in (e). Bars,

647 50mm. Data depicted are from two pooled experiments.\**p*<0.05. \*\**p*<0.01.

648

649 **Extended Data Figure 4. HDAC3<sup>ΔLysM</sup> mice do not demonstrate increased sensitivity**

650 **to DSS-induced intestinal damage and inflammation. (a)** Daily changes in body

651 weight, **(b)** disease score, **(c)** colon length and **(d)** representative H&E stained large

652 intestine sections of 2.5% DSS-treated HDAC3<sup>FF</sup> and HDAC3<sup>ΔLysM</sup> mice. Bars, 50mm.

653 *n*=4 mice per group. Data are representative of two independent experiments.

654

655 **Extended Data Figure 5. HDAC3<sup>ΔIEC-IND</sup> mice exhibit Paneth cell loss and impaired**

656 **barrier function following tamoxifen-induced deletion of HDAC3 in IECs. (a)**  
657 HDAC3<sup>ΔIEC-IND</sup> mice contain the floxed HDAC3 gene and a tamoxifen-dependent Cre  
658 recombinase (Cre-ER<sup>T2</sup>) controlled by the *Villin* promoter. **(b, c)** HDAC3 expression in  
659 IECs from HDAC3<sup>FF</sup> and HDAC3<sup>ΔIEC-IND</sup> mice by **(b)** real-time PCR and **(c)** Western  
660 analysis after tamoxifen treatment. **(d)** Representative H&E (top) and active caspase-3  
661 (bottom) stained sections of small intestine of HDAC3<sup>ΔIEC-IND</sup> mice treated with either  
662 vehicle or tamoxifen for three 5 day periods over 30 days. Arrows indicate dead cell  
663 (top) and positive nuclear staining (bottom). Bars, 50mm. **(e)** Albumin measured by  
664 ELISA from fecal samples harvested from the same mice prior to tamoxifen-induced  
665 HDAC3 deletion (-) and following tamoxifen-induced deletion (+). **(f)** FITC levels in  
666 plasma assessed 4 hours after oral gavage. HDAC3<sup>FF</sup> ( $n=3$ ), HDAC3<sup>ΔIEC-IND</sup> ( $n=8$ ). Data  
667 are representative of two independent experiments. \* $p < 0.05$ , \*\* $p < 0.01$ .

668

669 **Extended Data Figure 6. HDAC3<sup>ΔIEC-IND</sup> mice exhibit enhanced**  
670 **susceptibility to DSS-induced intestinal damage and inflammation. (a)**  
671 Representative large intestine and **(b)** colon length (% naive) after 5 days of 2.5% DSS.  
672 **(c)** Frequencies of neutrophils (CD11b<sup>+</sup> Ly6G<sup>+</sup>) and macrophages (CD11b<sup>+</sup> Ly6G<sup>-</sup>) in the  
673 colonic lamina propria. **(d)** Representative H&E stained intestine sections of HDAC3<sup>FF</sup>  
674 and HDAC3<sup>ΔIEC-IND</sup> mice. Bars, 50mm.  $n=4$  mice per group. Data are representative of  
675 four independent experiments. \*\* $p < 0.01$ .

676

677 **Extended Data Figure 7. Inhibition of IEC-intrinsic HDAC3 results in temporal and**  
678 **spatial alterations in the diversity of intestinal commensal bacteria. (a)** Average

679 UniFrac distance between HDAC3<sup>FF</sup> mice and HDAC3<sup>ΔIEC</sup> mice, or HDAC3<sup>FF</sup> and  
680 HDAC3<sup>ΔIEC</sup> based on 16S rRNA gene sequences determined from stool bacterial  
681 communities collected three times over a 4 week period from adult HDAC3<sup>FF</sup> and  
682 HDAC3<sup>ΔIEC</sup> mice. **(b)** Phylum level comparison of stool bacterial communities at each  
683 time point. **(c)** Phylum level comparison of bacterial communities in contents from small  
684 (SI) or large intestine (LI). **(d)** Average UniFrac distance between HDAC3<sup>FF</sup> mice and  
685 HDAC3<sup>ΔIEC-IND</sup> mice, or within HDAC3<sup>FF</sup> and HDAC3<sup>ΔIEC-IND</sup> groups based on 16S  
686 rRNA gene sequences determined from stool bacterial communities collected prior to  
687 tamoxifen induction (Pre) and 15 days following 5 days of tamoxifen administration  
688 (Post). **(e)** Principal coordinate analysis of samples in (a). *n*=3 mice per group. \**p*< 0.05,  
689 \*\**p*<0.01.

690

691 **Extended Data Figure 8. HDAC3-dependent regulation involves integration of**  
692 **commensal bacteria-derived signals.** Functional classification of enriched pathways by  
693 DAVID pathway analysis using genes represented in Figure 4a.

694

695 **Extended Data Figure 9. Epithelial HDAC3 integrates commensal bacteria-derived**  
696 **signals to establish commensalism and maintain tissue homeostasis.** **(a)** In the  
697 healthy HDAC3-sufficient intestine, HDAC3-dependent maintenance of intestinal  
698 homeostasis reflects an integrated effect of commensal-derived signals and host  
699 transcriptional networks. **(b)** Impaired IEC-intrinsic HDAC3-dependent gene regulation  
700 results in increased IEC proliferation, altered Paneth cell survival, intestinal dysbiosis,  
701 impaired intestinal barrier function and increased susceptibility to intestinal damage and

702 inflammation.

703

704 **Extended Data Figure 10. Pyrosequencing parameters. (a)** Number of reads and alpha  
705 diversity (observed species). **(b)** Rarefaction curves. **(c)** Principal coordinate analysis 2D  
706 plots. **(d)** Hierarchical clustering dendrograms.

707

708

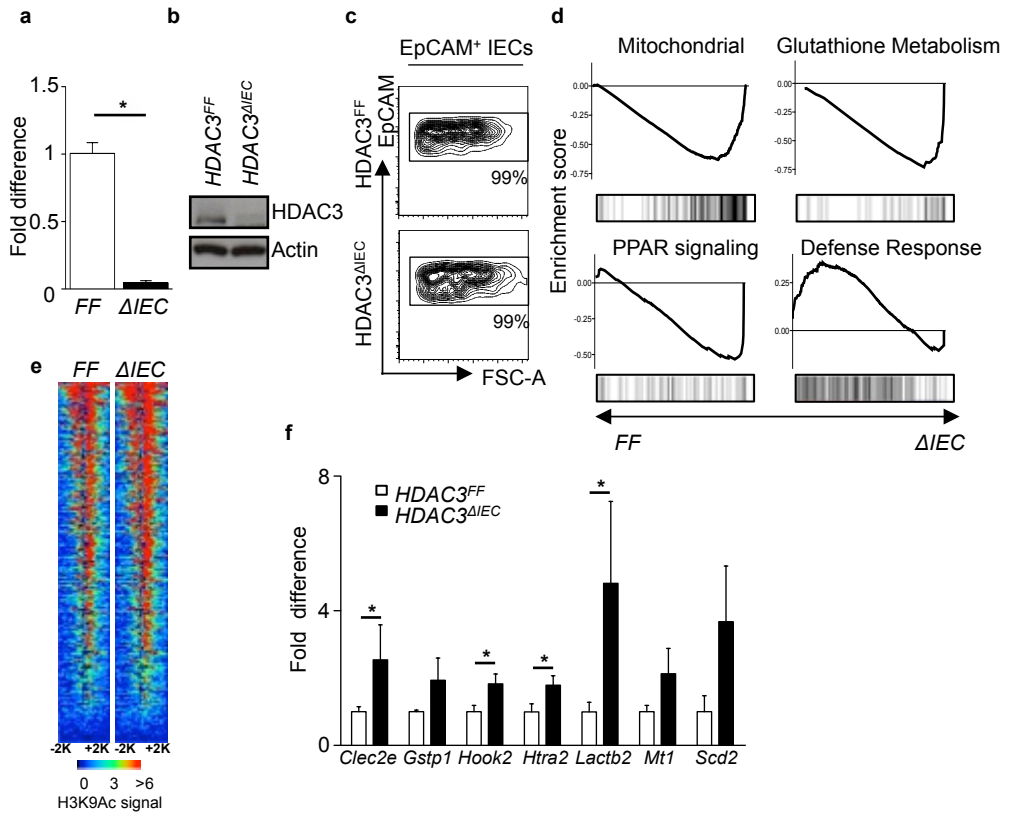

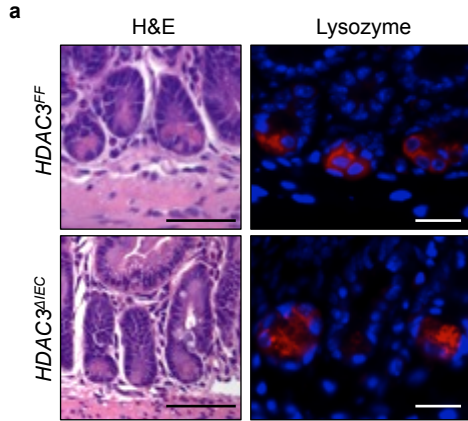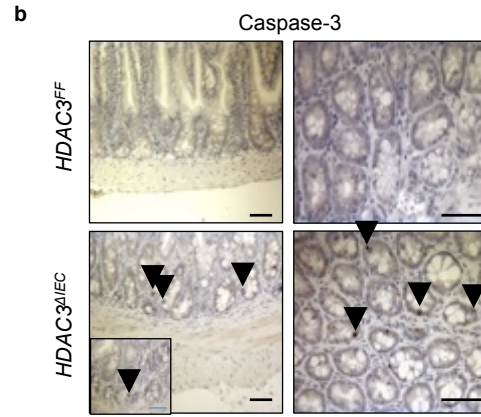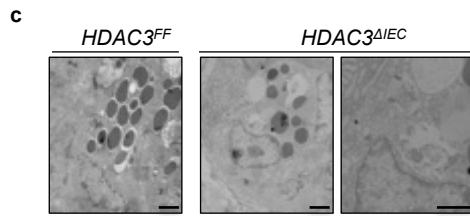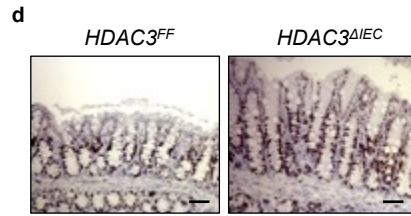

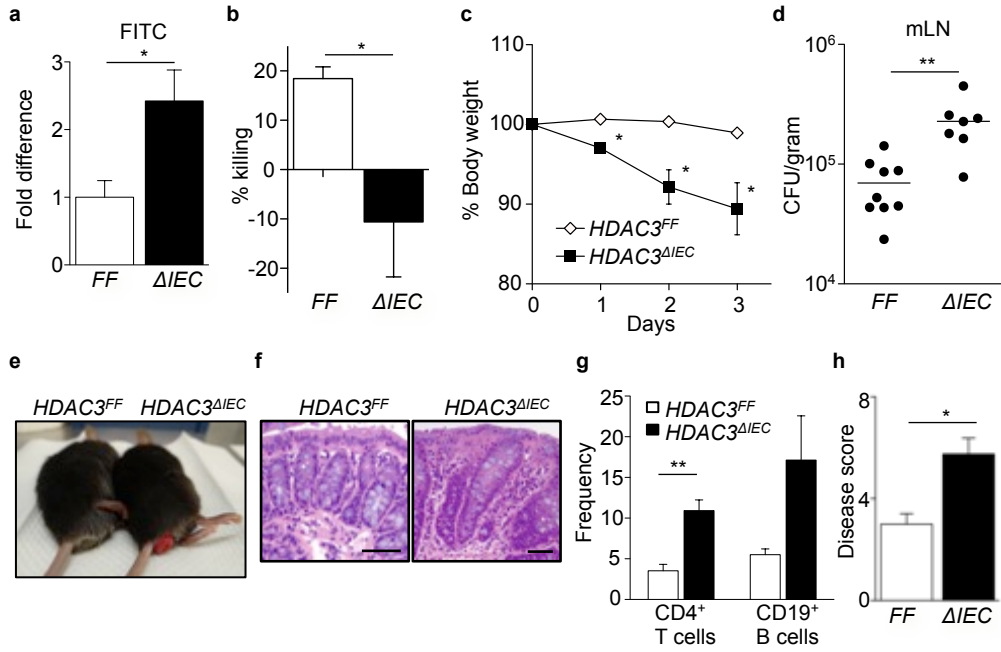



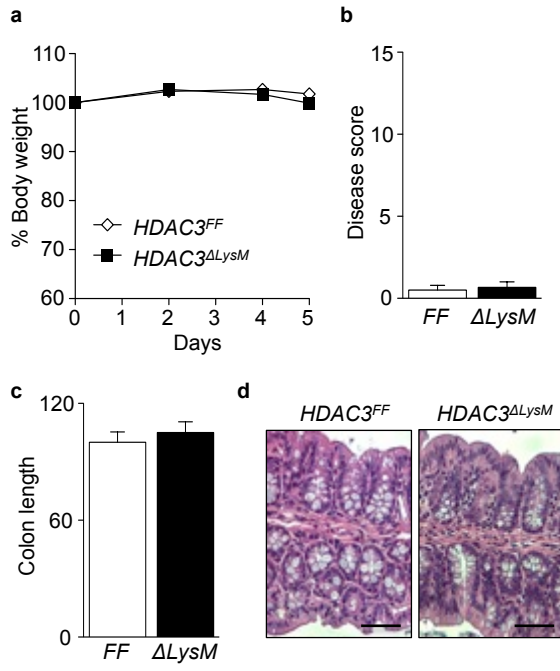

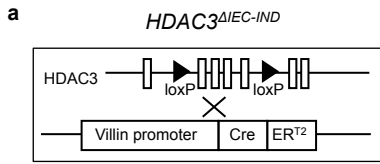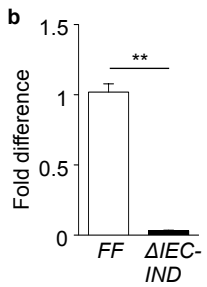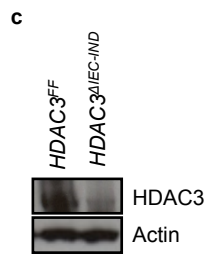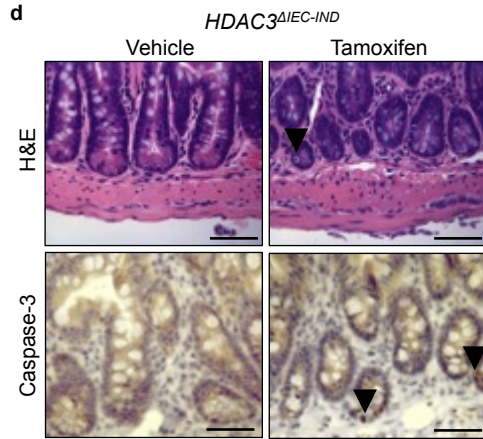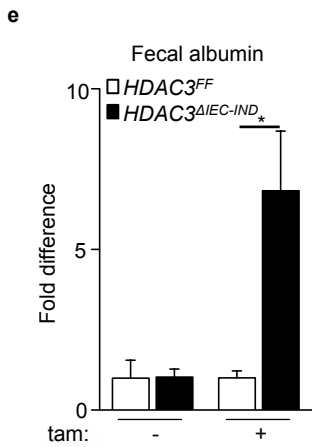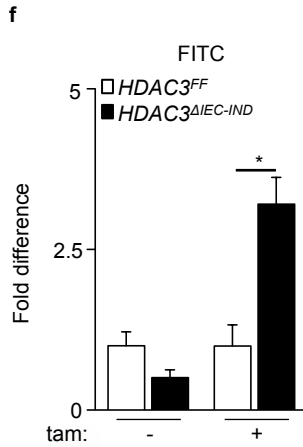

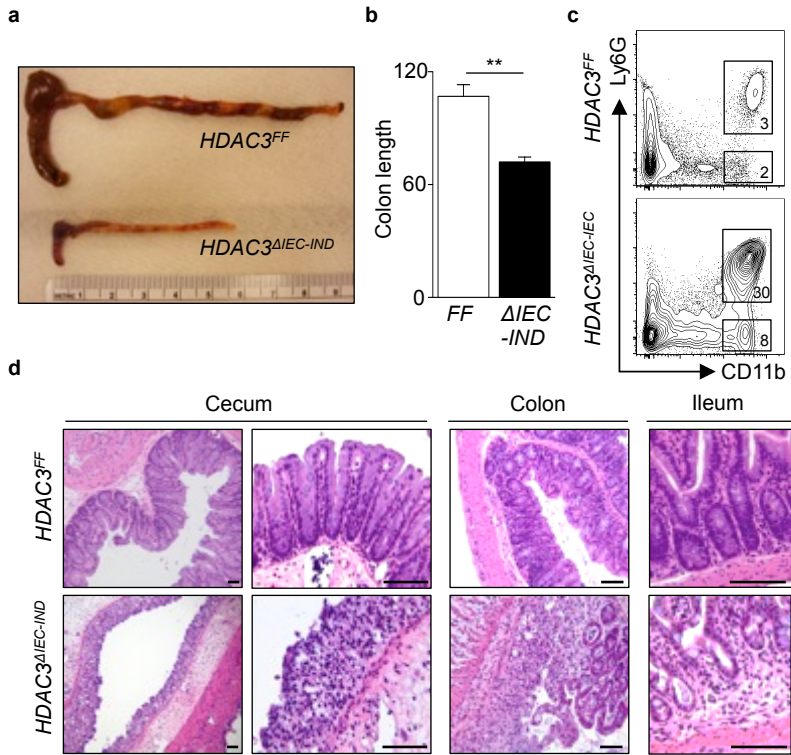

**a**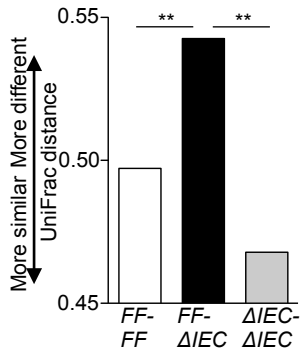**b**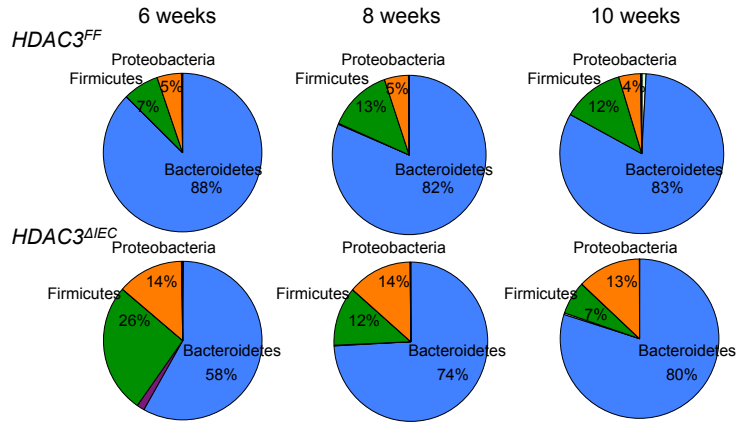**c**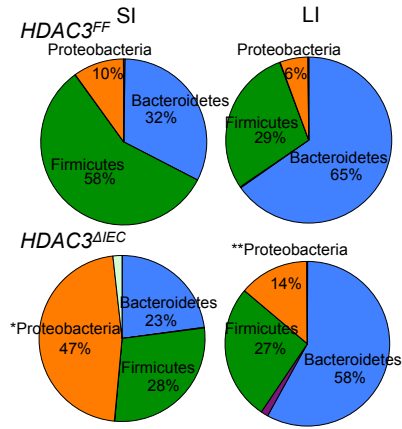**d**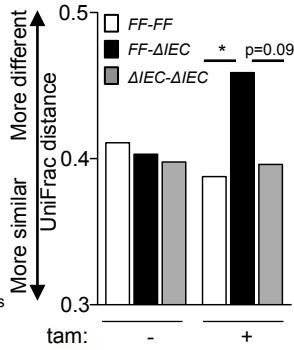**e**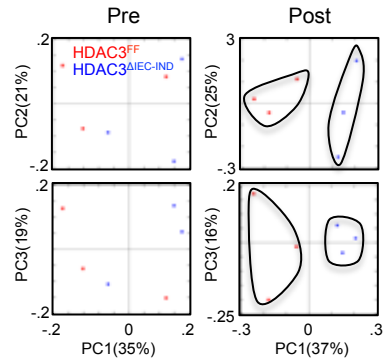

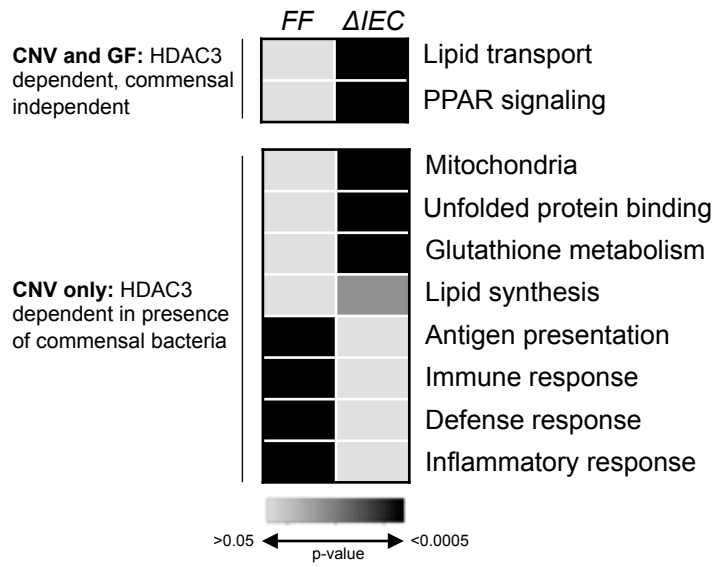

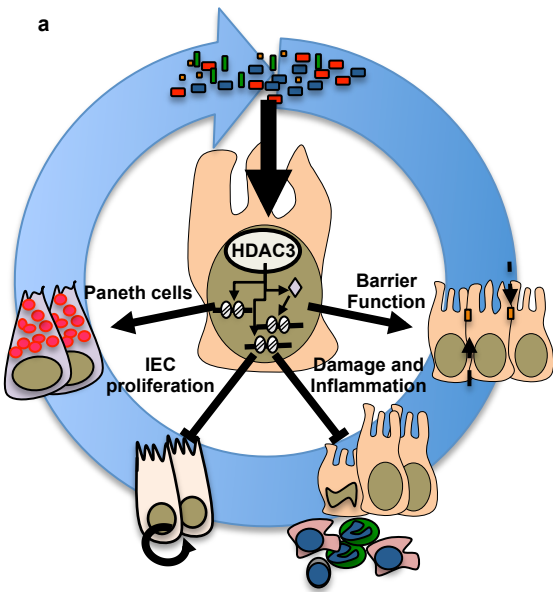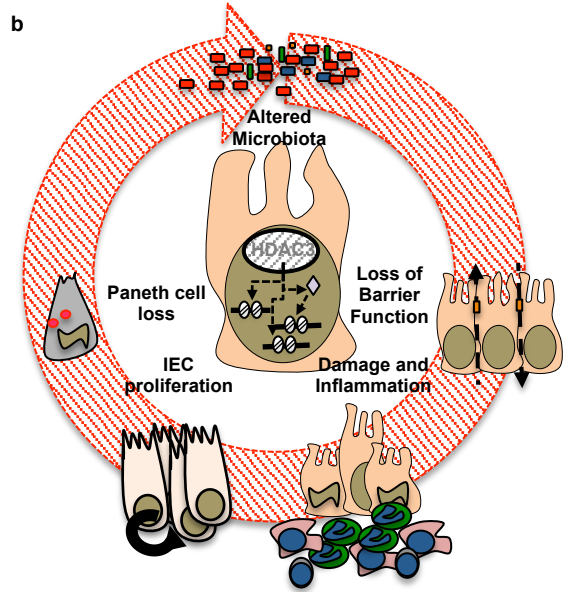

**a**

| Genotype         | Timepoint/ Location | Average reads | Average obs species |
|------------------|---------------------|---------------|---------------------|
| FF               | 6 weeks             | 4199          | 174                 |
| $\Delta$ IEC     | 6 weeks             | 2858          | 152                 |
| FF               | 8 weeks             | 3333          | 233                 |
| $\Delta$ IEC     | 8 weeks             | 3179          | 147                 |
| FF               | 10 weeks            | 1714          | 147                 |
| $\Delta$ IEC     | 10 weeks            | 2476          | 95                  |
| FF               | LI                  | 2368          | 231                 |
| $\Delta$ IEC     | LI                  | 1156          | 177                 |
| FF               | SI                  | 3641          | 71                  |
| $\Delta$ IEC     | SI                  | 2758          | 43                  |
| FF               | Pre                 | 2253          | 351                 |
| $\Delta$ IEC-IND | Pre                 | 2319          | 308                 |
| FF               | Post                | 2624          | 363                 |
| $\Delta$ IEC-IND | Post                | 1611          | 230                 |

**b**

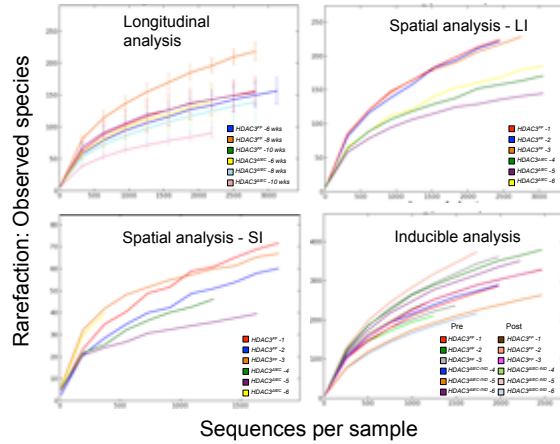

**c**

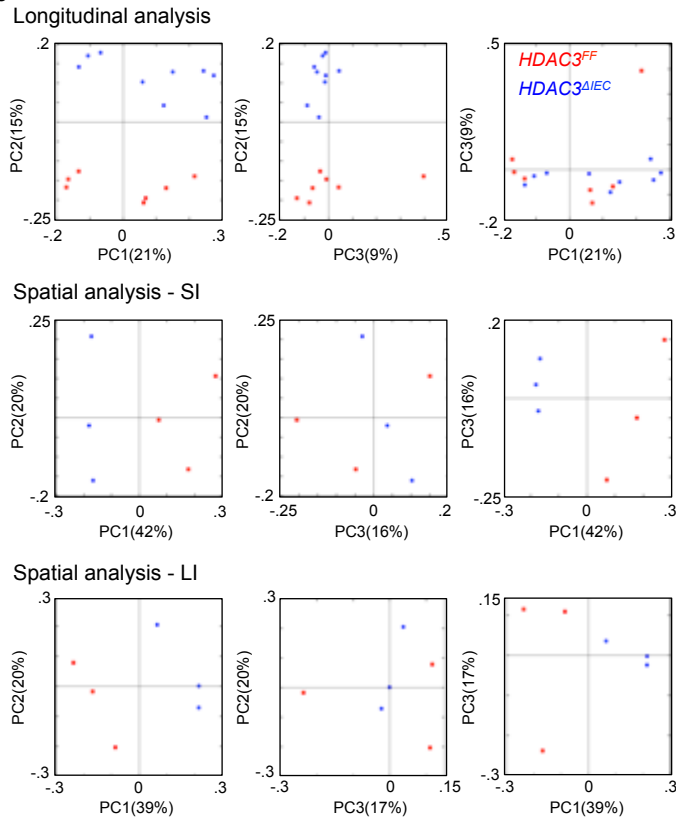

**d**

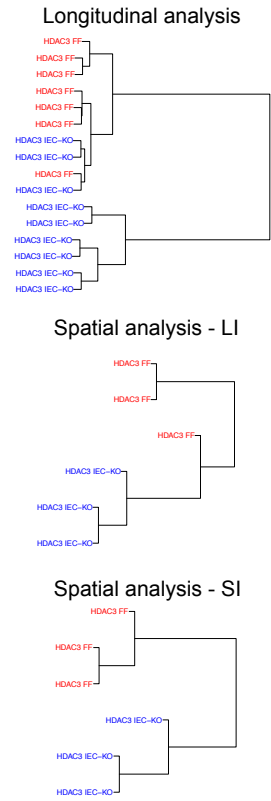

Supplement: NIHMS559408-supplement-01.pdf [file NIHMS559408-supplement-01.pdf]
